# Supplementary material
Source: PubMed Central journal article supplement (PMC2663986)
Supplement: 0813138106_0813138106SI.pdf [file 0813138106_0813138106SI.pdf]

# Supporting Information

Tong et al. 10.1073/pnas.0813138106

## SI Text

**Background for Pulse Dipolar ESR Techniques Used.** The signal  $V(t)$  recorded by the 4-pulse DEER sequence (1–3) is typically a product,  $V_{\text{inter}}(t)V_{\text{intra}}(t)$ , with  $V_{\text{intra}} = V_0(1 - p(1 - \cos\omega(\mathbf{r})t))_r$  containing the desired intramolecular dipolar signal,  $V_{\text{dip}}(t) = pV_0(\cos\omega(\mathbf{r})t)_r$ , originating from the dipole–dipole interaction of the electron spins residing on the same molecule. Here, the characteristic frequency  $\omega(\mathbf{r}) = \gamma_e^2\hbar(1 - 3\cos^2\Theta)/r^3$  is produced by the dipolar coupling between 2 electron spins separated by  $r \equiv |\mathbf{r}|$ ,  $\Theta$  is the angle between  $\mathbf{r}$  and the static polarizing magnetic field,  $\hbar$  is Planck's constant, and  $\gamma_e$  is the gyromagnetic ratio for an electron spin. Also,  $p$  is the fraction of spins flipped by the pumping pulse. The remainder of  $V_{\text{intra}}$ , that is,  $V_0(1 - p)$ , is a constant background from the fraction of spins that contribute to  $V(t)$  but have their partners unaffected by the pump pulse and do not add to dipolar signal. Removing this background isolates the  $V_{\text{dip}}(t)$ . As noted above,  $V(t)$ , recorded in DEER, is modified by a monotonically-decaying  $V_{\text{inter}}$ , which is produced by dipole–dipole couplings with all other electron spins surrounding the molecule. This presents a task of extracting  $V_{\text{intra}}$  because the exact time dependence of  $V_{\text{inter}}$  is often unknown and has to be approximated e.g., by fitting it to a low-order polynomial, using a sufficient number of the latter data points, with subsequent extrapolation of the remaining points. The isolated dipolar signals were analyzed by the L-curve Tikhonov regularization method (4) and refined by MEM (5) to recover the distance distribution,  $P(r)$ . Typical dipolar signals and respective  $P(r)$ s are shown in Fig. S1.

**VAMP2 Dimerization.** In the case of an oligomer of order  $N$ , bearing nitroxide spins  $k = 1, \dots, N$ , the dipolar signal can be written in the spirit of ref. 6:

$$V_{\text{intra}}(t) = V(0) \frac{1}{N} \left\langle \sum_{i=1}^N \prod_{k \neq i} (1 - f_k p_{ik} v_{ik}(r_{ik}, t)) \right\rangle_{r_{ik}}. \quad [\text{s1}]$$

Here,  $v_{ik}(\mathbf{r}_{ik}, t) \equiv \langle 1 - f_k p_{ik} \cos(\omega(\mathbf{r}_{ik})t) \rangle_r$  is the intermolecular dipolar signal detected on spin  $i$  when pumping on spin  $k$ ,  $p_{ik}$  is

the probability of flipping spin  $k$  by the pump pulse;  $\mathbf{r}_{ik}$  is the vector connecting spins  $i$  and  $k$ . Also,  $f_k$  is the probability for the site  $k$  to be populated with spin label. Angular brackets denote averaging over all possible values of  $\mathbf{r}_{ik}$ . All  $v_{ik}(t)$  are zero at  $t = 0$  and unity at  $t = \infty$ . We first assume that all  $f_k$  are equal to unity. Because  $p_{ik} \ll 1$  at sufficiently large  $t$ , and the  $p_{ik}$  normally exhibit only small variations, one can expand Eq. s1 as  $V_{\text{intra}}(t) \equiv V(0)[1 - (N - 1)p]$ . Thus the signal “modulation depth,”  $1 - V(\infty)/V(0)$ , is  $(N - 1)p$ , i.e., this is a measure of the number of spins in the oligomer ( $7, 8$ ). For just 2 spins  $N - 1 = 1$ , thus when one finds the modulation depth to be consistent with the calculated value of  $p$ , then there is a dimer. Certainly, care should be taken to make sure that  $f \approx 1$  or its value is known. The signal should be sampled over a sufficiently long time interval,  $t_m$ , to ensure  $v(t_m) \approx 1$ , ( $t_m$  of 1–2  $\mu\text{s}$  was sufficient for VAMP2). We show here a comprehensive example of the data obtained for VAMP2 singly labeled at position 109 reconstituted into  $\alpha$ -dodecyl-maltoside ( $\alpha$ -DDM) micelles and into the lipid environments, both with and without the addition of cholesterol. Because this mutant is  $>80\%$  labeled, the dipolar amplitudes agree well with just a dimer in  $\alpha$ -DDM and POPC/DOPS. Signals from  $\alpha$ -DDM and POPC/DOPS/Chol demonstrate single narrow distributions with average distances of 2.85 and 2.95 nm, respectively. This is clear indication that there are similar dimeric structures in these 2 cases. The signal shows signs of aggregation of dimers, (seen as a broad background in Fig. S2d, red curve) in the latter case. The strongly oscillating signals in Fig. S2a and c point to the nearly parallel “cones” sampled by MTSL side chains (9–11), leading to such a narrow distance distributions, thus giving a further support to the dimeric state. For the most of other mutants in detergents, the oscillations are less pronounced or absent, which can be attributed to the flexibility of MTSL side chains. The dimer in the absence of cholesterol shows no oscillations for all sites studied, indicating that the structure of the dimer is more conformationally heterogeneous than in the other 2 cases. The average distances however are in the range of 2.0–3.5 nm, with the larger values corresponding to the C terminus.

1. Borbat PP, Freed JH (2007) Measuring distances by pulsed dipolar ESR spectroscopy: Spin-labeled histidine kinases. *Methods Enzymol* 423:52–116.
2. Jeschke G (2002) Distance measurements in the nanometer range by pulse EPR. *Chem Phys Phys Chem* 3:927–932.
3. Milov AD, Maryasov AG, Tsvetkov YD (1998) Pulsed electron double resonance (PEL-DOR) and its applications in free-radicals research. *Appl Magn Reson* 15:107–143.
4. Chiang Y-W, Borbat PP, Freed JH (2005) The determination of pair distance distributions by pulsed ESR using Tikhonov regularization. *J Magn Reson* 172:279–295.
5. Chiang Y-W, Borbat PP, Freed JH (2005) Maximum entropy: A complement to Tikhonov regularization for determination of pair distance distributions by pulsed ESR. *J Magn Reson* 177:184–196.
6. Milov AD, Ponomarev AB, Tsvetkov YD (1984) Electron electron double-resonance in electron-spin echo—Model biradical systems and the sensitized photolysis of decalin. *Chem Phys Lett* 110:67–72.
7. Ponomarev AB, Milov AD, Tsvetkov YD (1991) Electron–electron double resonance in electron spin echo. Spatial distribution of radicals formed during radiolysis of polyethylene, mono-, and dicarboxylic acids. *Sov J Chem Phys* 8:826–835.
8. Upadhyay AK, Borbat PP, Wang J, Freed JH, Edmondson D. E (2008) Determination of the oligomeric states of human and rat monoamine oxidases in the outer mitochondrial membrane and octyl beta-D-glucopyranoside micelles using pulsed dipolar electron spin resonance spectroscopy. *Biochemistry* 47:1554–1566.
9. Borbat PP, Mchaourab HS, Freed JH (2002) Protein structure determination using long-distance constraints from double-quantum coherence ESR: Study of T4 lysozyme. *J Am Chem Soc* 124:5304–5314.
10. Hustedt EJ, et al. (2006) Dipolar coupling between nitroxide spin labels: The development and application of a tether-in-a-cone model more options. *Biophys J* 90:340–356.
11. Borbat PP, et al. (2007) Conformational motion of the ABC transporter MsbA induced by ATP hydrolysis. *PLoS Biol.* 5:2211–9.

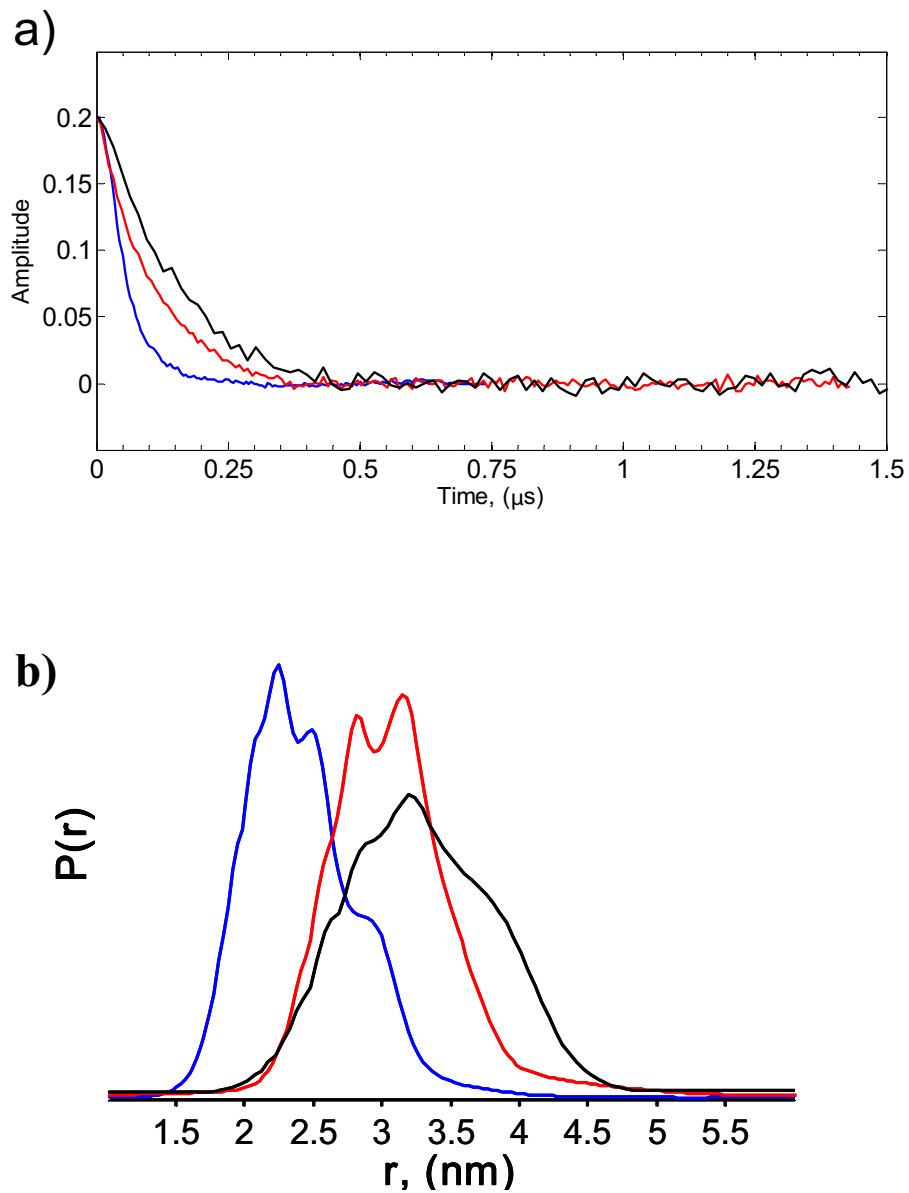

**Fig. S1.** Representative examples of DEER data for VAMP2 labeled at positions 100, 112, and 115. (a) Time-domain DEER signals. Signal backgrounds were removed by subtracting out second-degree polynomial fits using  $\approx 60\%$  of the latter data points in a logarithmic scale. Signals were normalized to a common value of 0.2 at zero time. (b) The respective distance distributions obtained by the L-curve Tikhonov regularization method with MEM refinement that included baseline fine adjustment into the fit.

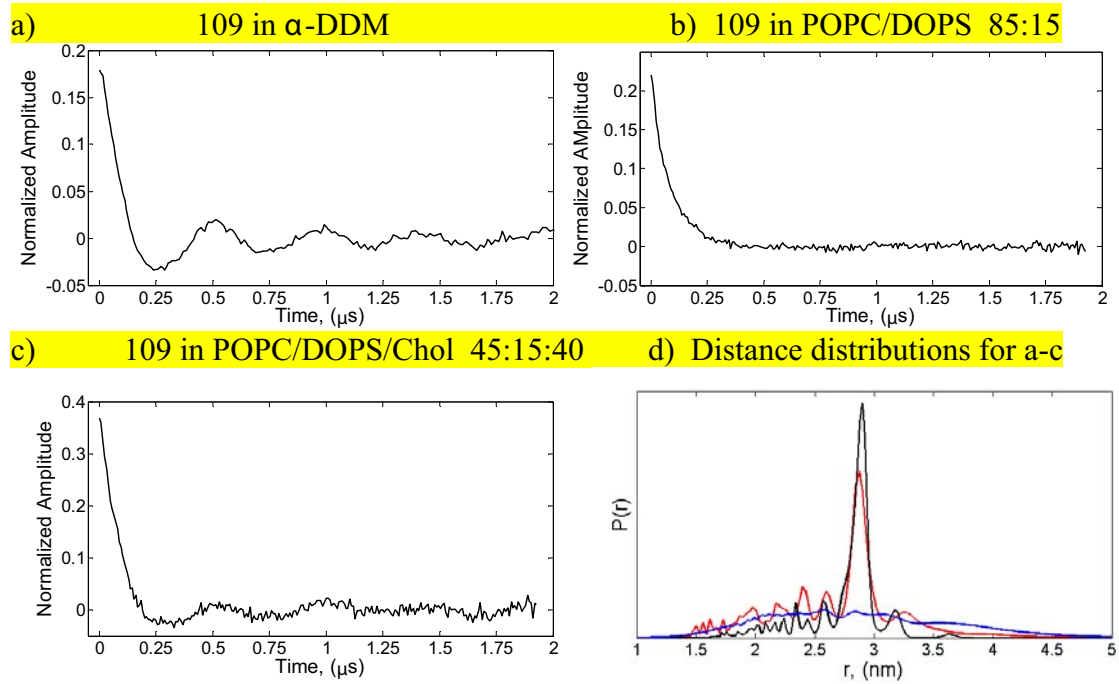

**Fig. S2.** VAMP2 dimer formation in detergent and vesicles. Normalized dipolar signals are shown after making standard correction for simple exponential background (in detergent) or slightly deviating from this (for liposomes). (a) The data were recorded for 109 mutants in  $\alpha$ -DDM. (b and c) Shown are 109 in POPC/DOPS (85:15) and POPC/DOPS/cholesterol (45:15:40), respectively. (d) Normalized distance distributions for a (black), b (blue), and c (red).

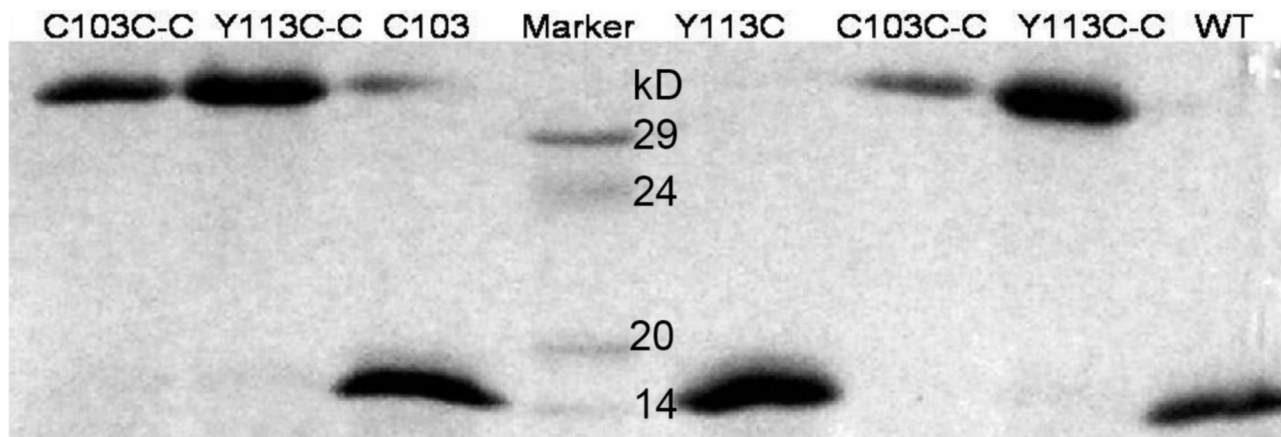

**Fig. S3.** SDS/PAGE gel analysis for cross-linked dimers. Y113C-C and C103C-C are the cross-linked dimers. The terms Y113C and C103 are for the noncross-linked dimers. Lanes 6 and 7 represent the proteins reconstituted into liposomes. Others represent the protein samples in detergent. The error bars were obtained from at least  $n = 4$  independent measurements from four different preparations.
